# Supplementary material
Source: Springer Nature journal article supplement (https://www.springermedizin.de/resource/supplementary/12960_2006_68_MOESM3_ESM.pdf/9570360)

HIGH-SKILL

*Clinical specialists (paediatricians etc.)*

Doctors and other health professions (pharmacists, etc.)

*(Pre-medical training)*

Registered nurses

*Enrolled nurses (upgraded 'auxiliary nurses') and other  
'sub-professionals'*

LOW-SKILL

*Lay counsellors*

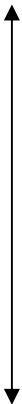

Supplement: MOESM3 [file 9570360]
